# Supplementary material for: Up-Regulation of the Nrf2/HO-1 Antioxidant Pathway in Macrophages by an Extract from a New Halophilic Archaea Isolated in Odiel Saltworks
Source: MDPI journal article supplement (doi:10.3390/antiox12051080), 2023-05-11
Supplement: s1 [file s1]

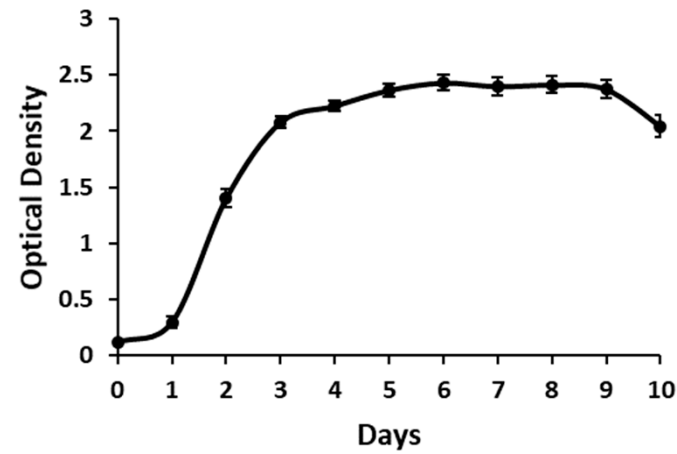

**Supplementary Figure S1.** Growth curve of the isolated haloarchaea *Haloarcula* sp. OS. The optical density was measured every day at 580 nm. This microorganism showed fast growth ( $\mu=1.02 \text{ days}^{-1}$ ). The replicates were obtained from two cultures in parallel, started with an inoculum at the end of the exponential phase and the OD was measured in 1 mL cuvettes.

CGATTAGCCCTGCTAGTCGCACGGGTCTTAGACTCCGTAGGC  
ATATAGCTCAGTAACACGTGGCCAACTACCCTACAGACCGC  
GATAACCTCGGGAACTGAGGCCAATAGCGGATATAACTCTC  
AGGCTGGAGTGCCGAGAGTTAGAAAACGTTCCGGCGCTGTAGG  
ATGTGGCTGCGGCCGATTAGGTAGATGGTGGGGTAACGGCCC  
ACCATGCCGATAATCGGTACGGGTTGTTGGAGAGCAAGAACC  
CGGAGACGGTATTTGAGACAAGATAACGGGGCCCTACGGGGC  
GCAGCAGGCGGGAAACCTTTACACTGCACGACAGTGCGATA  
GGGGGACTCCGAGTGTGAGGGCATATAGCCCTCGCTTTTCTG  
TACCGTAAGGTGGTACAGGAACAAGGACTGGGCAAGACCGG  
TGCCAGCCGCCGCGTAATACCGGCAGTCCAAGTGATGGCCG  
ATATTATTGGGCCTAAAGCGTCCGTATTCGGCCGGACAAGTC  
CGTTGGGAAATCGACGAGCTCAACTGGTCGGCGTCCAGTGGA  
AACTACCCGGCTTGGGGCCGGAAGACTTGACGGGTACGTCCG  
GGGTAGGAGTGAAATCCTGTAATCCTGGACGGACCACCAATG  
GGGAAACCACCTCAGGAAGCCGGACCCGACGGTGAGGGACG  
AAAGCCAGGGTCTCGAACCGGATTAGATACCCGGGTAGTCCT  
GGCTGTAAACGATGCTCGCTAGGTGTGCCGTAGGCCACGAGC  
ATGCGATGCGCCGTAGTGAAGCCGAGAAGCGAGCCGCTGG  
GAAGTACGTCCGCAAGGATGAACTTAAAGGAATTGGCGGG  
GGAGCACCACAACCGGAGGAGCCTGCGGTTTAATTGGACTCA  
ACGCCGGAATCTCACCGGTCCCGACAGTAGTAATGACGGTC  
AGGTTGACGACTTTACTCGACGCTACTGAGAGGAGGTGCATG  
GCCGCCGTCAGCTCGTACCGTGAGGCGTCCTGTTAAGTCAGG  
CAACGAGCGAGACCCGCACTTCTAGTTGCCAGCAATACCCTT  
GAGGTAGTTGGGTACACTAGGAGGACTGCCGCTGCTAAAGCG  
GAGGAAGGAACGGGCAACGGTAGGTCAGTATGCCCCGAATG  
GACCGGGCAACACGCGGGCTACAATGGCTCTGACAGTGGGA  
TGCAACGCCGAGAGGCGACGCTAATCTCCAAACGGAGTCGT  
AGTTCGGATTGCGGGCTGAAACCCGCCCCGCATGAAGCTGGAT  
TCGGTAGTAATCGCGTGTGAGAAGCGCGCGGTGAATACGTCC  
CTGCTCCTTGACACACCCGCCCCGTCAAAGCACCCGAGTGGGG  
TCCGGATGAGGCCGTCATGCGACGGTCGAATC

**Supplementary Figure S2.** Full length of the 16S rRNA encoding gene from *Haloarcula* sp. OS, amplified with the archaeal specific primers 21F (5'-TTCCGGTTGATCCTGCCGGA-3') and 1492R (5'-GGTTACCTTGTTACGACTT-3'). Polymerase chain reactions (PCR) were performed as indicated in the Materials and Methods section
